# Supplementary material
Source: publisher figshare collection journal article supplement (https://gsajournals.figshare.com/ndownloader/files/20183147)
Supplement: Supplementary file 1 [file 20183147]

## Sheet: Sheet1
Table S3. List of 99 virulence related genes shared by strains GJ0703 and CT18
GJ0703 gene	Synonym	Location	Strand	Length	Gene	Product
GJ0703GL000009	STY3948	8679..9701	+	340	-	hypothetical protein
GJ0703GL000010	STY3949	9740..10837	+	365	-	Outer membrane protein
GJ0703GL000011	STY3950	10834..11961	+	375	-	DUF4056 domain-containing protein
GJ0703GL000217	STY3922	226652..227716	+	354	stgD	long polar fimbrial protein LpfD
GJ0703GL000231	STY4175	242427..242552	+	41	-	hypothetical protein
GJ0703GL000262	STY4207	283208..283762	-	184	-	hypothetical protein
GJ0703GL000263	STY4208	283929..284582	+	217	-	hypothetical protein
GJ0703GL000614	STY3481	643483..644448	+	321	-	EamA family transporter
GJ0703GL000655	STY3443	685582..686955	-	457	-	PTS galactitol transporter subunit IIC
GJ0703GL000656	STY3442	686959..687243	-	94	-	PTS galactitol transporter subunit IIB
GJ0703GL000657	STY3441	687274..687738	-	154	-	PTS galactitol transporter subunit IIA
GJ0703GL000792	STY3303	821533..822411	+	292	-	amidohydrolase
GJ0703GL000808	STY3289	832900..833439	-	179	-	hypothetical protein
GJ0703GL000809	STY3288	833528..833950	-	140	-	hypothetical protein
GJ0703GL000811	STY3283	835605..835889	-	94	-	bacteriocin immunity protein
GJ0703GL000812	STY3281	836126..836392	-	88	-	bacteriocin immunity protein
GJ0703GL000823	STY3268	842311..843567	-	418	-	nucleoside permease
GJ0703GL000974	STY3115	990820..992097	-	425	-	L-fucose permease
GJ0703GL000997	STY3091	1017276..1018268	-	330	-	hypothetical protein
GJ0703GL000998	STY3090	1018398..1018934	-	178	steF	fimbrial subunit
GJ0703GL000999	STY3089	1018931..1019392	-	153	steE	putative minor fimbrial subunit
GJ0703GL001000	STY3088	1019416..1019922	-	168	steD	hypothetical protein
GJ0703GL001001	STY3087	1019942..1020715	-	257	steC	fimbrial protein StfD
GJ0703GL001002	STY3086	1020728..1023373	-	881	steB	outer membrane usher protein
GJ0703GL001212	STY3658	1225681..1226706	-	341	-	integrase
GJ0703GL001214	STY4643	1227462..1227704	+	80	apl	MULTISPECIES: Rha family transcriptional regulator
GJ0703GL001215	STY3662	1227737..1228246	+	169	cII	hypothetical protein
GJ0703GL001216	STY4641	1228308..1228454	+	48	-	DUF2724 domain-containing protein
GJ0703GL001217	STY3664	1228508..1228759	+	83	-	hypothetical protein
GJ0703GL001218	STY3665	1228827..1229060	+	77	-	DUF2732 domain-containing protein
GJ0703GL001219	STY3666	1229072..1229287	+	71	-	hypothetical protein
GJ0703GL001220	STY4637	1229284..1229868	+	194	-	3'-5' exonuclease
GJ0703GL001221	STY3667	1229865..1230725	+	286	-	DNA adenine methylase
GJ0703GL001222	STY3668	1230722..1233145	+	807	-	Probable replication endonuclease from prophage-like region
GJ0703GL001228	STY3674	1237162..1238196	-	344	-	phage portal protein
GJ0703GL001229	STY3675	1238196..1239914	-	572	-	Terminase ATPase subunit (GpP)
GJ0703GL001230	STY3676	1240111..1240938	+	275	-	phage capsid protein
GJ0703GL001231	STY3677	1240955..1242019	+	354	-	phage capsid protein
GJ0703GL001232	STY3678	1242023..1242673	+	216	-	phage terminase
GJ0703GL001233	STY3679	1242767..1243231	+	154	-	head completion/stabilization protein
GJ0703GL001234	STY3680	1243231..1243434	+	67	-	MULTISPECIES: tail protein X
GJ0703GL001235	STY3681	1243438..1243653	+	71	nucE	hypothetical protein
GJ0703GL001236	STY4620	1243634..1244143	+	169	nucD2	MULTISPECIES: glycoside hydrolase
GJ0703GL001237	STY4619	1244148..1244525	+	125	-	hypothetical protein
GJ0703GL001238	STY3684	1244525..1244950	+	141	-	hypothetical protein
GJ0703GL001240	STY3685	1245046..1245477	+	143	-	MULTISPECIES: tail protein
GJ0703GL001241	STY3686	1245470..1245916	+	148	-	phage virion morphogenesis protein
GJ0703GL001244	STY3687	1247746..1248324	+	192	-	phage baseplate assembly protein V
GJ0703GL001245	STY3688	1248321..1248680	+	119	-	baseplate assembly protein
GJ0703GL001246	STY3689	1248667..1249575	+	302	-	baseplate assembly protein
GJ0703GL001247	STY3690	1249568..1250173	+	201	-	phage tail protein I
GJ0703GL001249	STY4610	1251831..1252367	+	178	-	tail fiber assembly like-protein
GJ0703GL001254	STY2887	1255819..1256334	+	171	-	MULTISPECIES: major tail tube protein
GJ0703GL001255	STY2886	1256389..1256691	+	100	-	MULTISPECIES: phage tail assembly protein
GJ0703GL001256	STY2885	1256706..1256825	+	39	-	GpE family phage tail protein
GJ0703GL001258	STY2883	1259622..1260107	+	161	-	phage P2 GpU family protein
GJ0703GL001259	STY2882	1260104..1261204	+	366	-	phage late control D family protein
GJ0703GL001264	STY2875	1266865..1278240	-	3791	-	VCBS repeat-containing protein
GJ0703GL001412	STY2731	1445211..1446500	+	429	-	putative permease
GJ0703GL001514	STY1019	1552475..1552669	-	64	-	hypothetical protein
GJ0703GL001639	STY2544	1684831..1685757	-	308	-	Ribonuclease BN
GJ0703GL001704	STY3966	1757095..1758138	+	347	ccmH2	cytochrome c biogenesis protein CcmH
GJ0703GL001806	STY2364	1861871..1862488	+	205	-	hypothetical protein
GJ0703GL001818	STY2420	1871331..1871465	+	44	-	hypothetical protein
GJ0703GL001819	STY2350	1871568..1872311	+	247	-	hypothetical protein
GJ0703GL001820	STY2349	1872442..1873161	-	239	-	tetratricopeptide repeat-containing protein
GJ0703GL002059	STY2104	2108257..2108949	+	230	-	hypothetical protein
GJ0703GL002243	STY1330	2281772..2282392	+	206	-	hypothetical protein
GJ0703GL002304	STY1393	2341058..2341915	-	285	-	AraC family transcriptional regulator
GJ0703GL002309	STY1398	2346594..2346932	-	112	-	hypothetical protein
GJ0703GL002489	STY1554	2537810..2539189	-	459	-	MFS transporter
GJ0703GL002771	STY1268	2807462..2808796	-	444	-	periplasmic protein
GJ0703GL002879	STY1162	2904048..2904836	-	262	-	Protein PhoH
GJ0703GL003007	STY4828	3047067..3047333	+	88	-	hypothetical protein
GJ0703GL003148	STY0823	3192374..3194059	-	561	hutU	Urocanate hydratase
GJ0703GL003360	STY0609	3417927..3418136	+	69	-	hypothetical protein
GJ0703GL003625	STY0359	3681532..3682683	-	383	-	Protein RtcB
GJ0703GL003638	STY0349	3693588..3694043	-	151	tinR	Lrp/AsnC family transcriptional regulator
GJ0703GL003639	STY0348	3694176..3695282	-	368	tcfD	fimbrail protein
GJ0703GL003640	STY0347	3695305..3697974	-	889	tsaC	outermembrane fimbrial usher protein
GJ0703GL003641	STY0346	3698101..3698619	-	172	tcfB	fimbrial protein
GJ0703GL003642	STY0345	3698727..3699437	-	236	tcfA	fimbrial protein TcfA
GJ0703GL003698	STY0266	3761209..3761910	-	233	-	copper homeostasis/adhesion lipoprotein NlpE
GJ0703GL003763	STY0207	3836083..3836688	+	201	staA	fimbrial protein StkA
GJ0703GL003764	STY0206	3836775..3837527	+	250	staB	fimbrial chaperone
GJ0703GL003765	STY0205	3837595..3840192	+	865	staC	outer membrane usher protein
GJ0703GL003767	STY0203	3840883..3841383	+	166	staE	fimbrial protein
GJ0703GL003768	STY0202	3841402..3842001	+	199	staF	fimbrial protein
GJ0703GL003802	STY0180	3873823..3875451	+	542	-	DUF3300 domain-containing protein
GJ0703GL003825	STY0158	3898119..3899048	+	309	-	aldo/keto reductase
GJ0703GL004126	STY4853	4203546..4204421	-	291	-	HNH endonuclease
GJ0703GL004128	STY4851	4205005..4208304	+	1099	-	hypothetical protein
GJ0703GL004139	STY4592	4219260..4219601	-	113	-	toxin
GJ0703GL004164	STY4821	4239382..4240650	-	422	-	hypothetical protein
GJ0703GL004201	STY4794	4274114..4275532	+	472	treB	PTS trehalose transporter subunit IIBC
GJ0703GL004452	STY1628	4539366..4539683	+	105	-	phage tail assembly protein
GJ0703GL004602	STY2419	4703349..4703852	-	167	insB	Insertion element IS1 protein InsB
GJ0703GL004713	STY3614	4820709..4820939	+	76	-	hypothetical protein
GJ0703GL004743	STY3644	4853988..4854701	-	237	-	putative purine nucleoside phosphorylase
